# Supplementary material
Source: publisher figshare collection journal article supplement (https://aacr.figshare.com/articles/dataset/_/22415714)
Supplement: Supplementary file 1 [file 39861767]

**Table S2.** DJ101 overcomes taxane resistance *in vitro*. **RI**: resistance index is calculated by dividing the IC<sub>50</sub> value of compound in resistant cell lines by the IC<sub>50</sub> in the corresponding parental cell lines.

| Cell Lines | IC <sub>50</sub> ± SEM (nM) |               |                  |                  |
|------------|-----------------------------|---------------|------------------|------------------|
|            | DJ101                       | Colchicine    | Paclitaxel       | Docetaxel        |
| PC-3       | 8.5 ± 0.7                   | 8.0 ± 0.8     | 3.7 ± 0.3        | 0.5 ± 0.1        |
| PC-3/TxR   | 6.4 ± 0.3                   | 28.1 ± 1.2    | 110.7 ± 3.7      | 27.9 ± 1.1       |
| <b>RI*</b> | <b>0.75</b>                 | <b>3.5</b>    | <b>30.0</b>      | <b>55.8</b>      |
| DU-145     | 18.2 ± 0.9                  | 25.7 ± 1.4    | 1.1 ± 0.1        | 0.10 ± 0.01      |
| DU-145/TxR | 63.3 ± 7.2                  | >1,000        | >1,000           | 352.3 ± 118.2    |
| <b>RI*</b> | <b>3.5</b>                  | <b>&gt;40</b> | <b>&gt;1,000</b> | <b>&gt;3,523</b> |
